# Supplementary material
Source: PubMed Central journal article supplement (PMC7655350)
Supplement: 18-00558.pdf [file 18-00558.pdf]

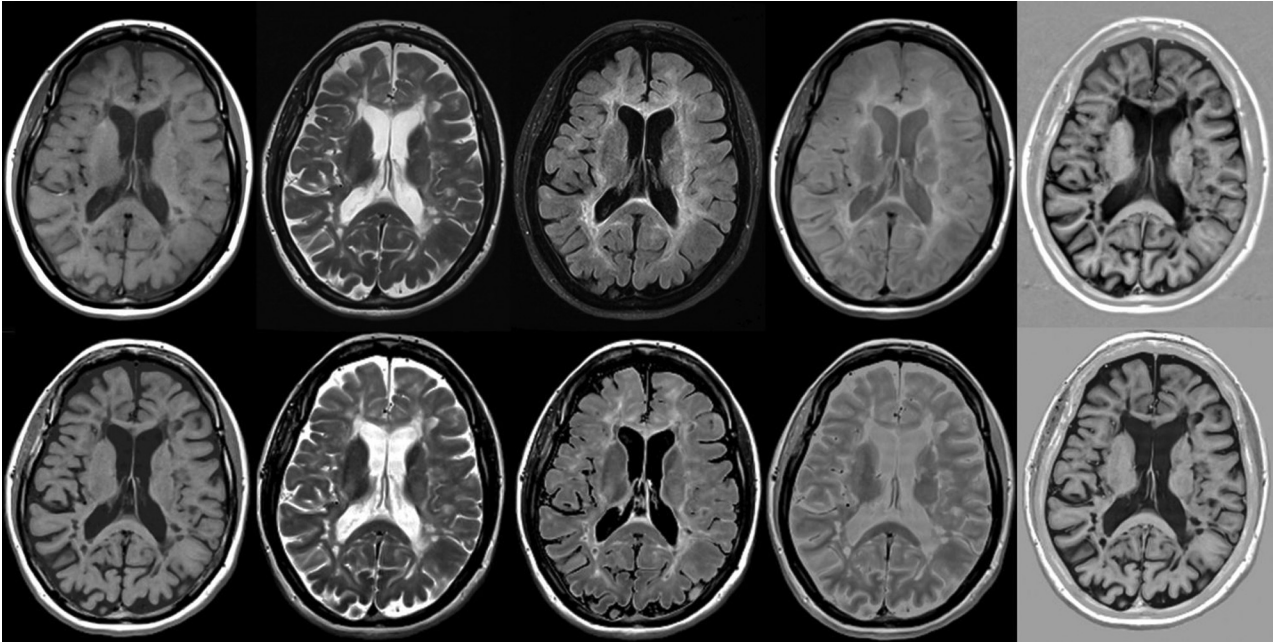

**ON-LINE FIGURE.** The *upper row* illustrates conventional MR images (from left to right: T1, T2, FLAIR, proton-density, and PSIR images), while the *bottom row* shows the equivalent sequences from synthetic MR imaging in a 50-year-old female patient with MS.
